# Supplementary material for: Estimating Need for Glasses and Hearing Aids in The Gambia: Results from a National Survey and Comparison of Clinical Impairment and Self-Report Assessment Approaches
Source: MDPI journal article supplement (doi:10.3390/ijerph18126302), 2021-06-10
Supplement: s1 [file s1]

**File S3**

**S3a: Demographic characteristics of the 2013 census population, vision study sample and hearing study sample [12].**

|                    | <b>2013 CENSUS POPULATION*</b> | <b>STUDY SAMPLE – VISION<br/>N=9188</b> | <b>STUDY SAMPLE – HEARING<br/>N=1393</b> |
|--------------------|--------------------------------|-----------------------------------------|------------------------------------------|
|                    | N (%)                          | N (%)                                   | N (%)                                    |
| <b>Age</b>         |                                |                                         |                                          |
| Overall (aged 35+) | 383,727 (100)                  | 9188 (100)                              | 1393 (100)                               |
| 35 – 44            | 167595 (43.7)                  | 4102 (44.7)                             | 659 (47.3)                               |
| 45 – 54            | 101183 (26.4)                  | 2061 (22.4)                             | 323 (23.2)                               |
| 55 – 64            | 56894 (14.8)                   | 1444 (15.7)                             | 225 (16.2)                               |
| 65 – 74            | 33755 (8.8)                    | 1018 (11.1)                             | 137 (9.8)                                |
| 75 – 84            | 16521 (4.3)                    | 441 (4.8)                               | 38 (2.7)                                 |
| 85+                | 7779 (2.0)                     | 122 (1.3)                               | 11 (0.8)                                 |
| <b>Sex</b>         |                                |                                         |                                          |
| Male               | 192,969 (50.3)                 | 2710 (29.5)                             | 424 (30.4)                               |
| Female             | 190,758 (49.7)                 | 6478 (70.5)                             | 969 (69.6)                               |
| <b>Location</b>    |                                |                                         |                                          |
| Urban              | 1,073,297 (57.8)               | 5039 (54.8)                             | 906 (65.0)                               |
| Rural              | 783,884 (42.2)                 | 4149 (45.2)                             | 487 (35.0)                               |

\* Data from the 2013 census.

**S3b: Demographic characteristics of the hearing survey responders and non-responders.**

|                    | <b>HEARING RESPONDERS<br/>N=1393</b> | <b>HEARING NON- RESPONDERS<br/>N=944</b> |
|--------------------|--------------------------------------|------------------------------------------|
|                    | N (%)                                | N (%)                                    |
| <b>Age</b>         |                                      |                                          |
| Overall (aged 35+) | 1393 (100)                           | 944 (100)                                |
| 35 – 44            | 659 (47.3)                           | 356 (37.7)                               |
| 45 – 54            | 323 (23.2)                           | 206 (21.8)                               |
| 55 – 64            | 225 (16.2)                           | 142 (15.0)                               |
| 65 – 74            | 137 (9.8)                            | 141 (14.9)                               |
| 75 – 84            | 38 (2.7)                             | 65 (6.9)                                 |
| 85+                | 11 (0.8)                             | 34 (3.6)                                 |
| <b>Sex</b>         |                                      |                                          |
| Male               | 424 (30.4)                           | 245 (26.0)                               |
| Female             | 969 (69.6)                           | 699 (74.0)                               |
| <b>Location</b>    |                                      |                                          |
| Urban              | 906 (65.0)                           | 562 (59.5)                               |
| Rural              | 487 (35.0)                           | 382 (40.5)                               |
