# Supplementary material for: Estimating Need for Glasses and Hearing Aids in The Gambia: Results from a National Survey and Comparison of Clinical Impairment and Self-Report Assessment Approaches
Source: MDPI journal article supplement (doi:10.3390/ijerph18126302), 2021-06-10
Supplement: s1 [file s1]

File S4

S4a: Clinical impairment assessment and self-reported unmet/undermet need for near and/or distance glasses (both mild and moderate vision impairment).

|                                    | <b>GLASSES UNMET/UNDERMET NEED*</b>   |                   |                                |                               |                                  |                          |
|------------------------------------|---------------------------------------|-------------------|--------------------------------|-------------------------------|----------------------------------|--------------------------|
| <b>Clinical impairment AD need</b> | <i>Clinical impairment assessment</i> |                   |                                |                               |                                  |                          |
|                                    | Distance glasses only                 | Near glasses only | Both distance and near glasses | <i>Total distance glasses</i> | <i>Total near vision glasses</i> | <b>TOTAL all glasses</b> |
| All glasses (mild/worse VI)        | 161                                   | 3634              | 371                            | 532                           | 4005                             | <b>4166</b>              |
| All glasses (moderate/worse VI)    | 241                                   | 3821              | 184                            | 425                           | 4005                             | <b>4246</b>              |
| <b>Washington group response</b>   | <i>Self-reported</i>                  |                   |                                |                               |                                  |                          |
| Some/worse difficulty (n=2530)     |                                       |                   | 1681                           |                               |                                  | <b>1681</b>              |
| A lot/worse difficulty (n=179)     |                                       |                   | 128                            |                               |                                  | <b>128</b>               |

\*Washington group data was data missing for 8 participants.

**S4b: Clinical impairment assessment and self-reported unmet/undermet need for hearing aids (both mild and moderate hearing impairment).**

| Clinical impairment AD need       | HEARING AIDS UNMET/UNDERMET NEED      |
|-----------------------------------|---------------------------------------|
|                                   | <i>Clinical impairment assessment</i> |
| Mild/worse HI                     | 367                                   |
| Moderate/worse HI                 | 23                                    |
| <b>Washington group response*</b> | <b><i>Self-reported</i></b>           |
| Some/worse difficulty (n=23)      | 17                                    |
| A lot/worse difficulty(n=3)       | 3                                     |

\* Comparison is limited to only hearing clinical impairment assessment survey participants (n=1393) for those reporting “some or worse” or “a lot or worse” difficulty hearing with or without hearing aids; Washington group survey responses for full survey participants (n=9180) are reported in Table 1, i.e. n=385 for “some or worse” difficulty hearing with or without hearing aids and n=55 for “a lot or worse” difficulty hearing with or without hearing aids
